# Supplementary material for: MiR-16-5p regulates postmenopausal osteoporosis by directly targeting VEGFA
Source: publisher site journal article supplement (doi:10.18632/aging.103223), 2020-05-19
Supplement: Supplementary file [file aging-v12i10-103223-supplementary-material-SD1.pdf]

## SUPPLEMENTARY FIGURE

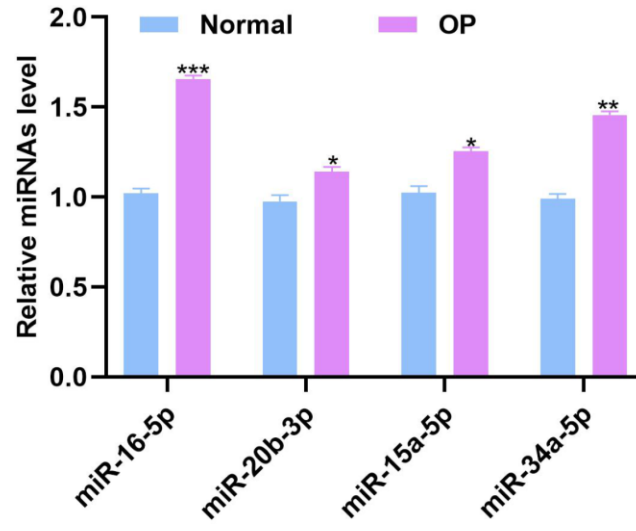

Supplementary Figure 1. The expression of the related miRNAs between the non-OP patients (n=10) and the OP patients (n=10) were measured by qRT-PCR analysis.
